# Supplementary material
Source: PubMed Central journal article supplement (PMC5710175)
Supplement: jamacardiol-2-967-s001.pdf [file jamacardiol-2-967-s001.pdf]

## Supplementary Online Content

Kobayashi T, Glorioso TJ, Armstrong EJ, et al. Comparative outcomes after percutaneous coronary intervention among black and white patients treated at US Veterans Affairs hospitals. *JAMA Cardiol*. Published online July 5, 2017. doi:10.1001/jamacardio.2017.2180

**eTable 1.** Unadjusted Outcomes Stratified by Presence or Absence of ACS

**eTable 2.** Adjusted Analysis of Bare-Metal Stent Use and  $\beta$ -Blocker Prescription Stratified by Presence or Absence of ACS

This supplementary material has been provided by the authors to give readers additional information about their work.

**eTable 1. Unadjusted Outcomes Stratified by Presence or Absence of ACS**

|                                 | <b>Black</b> | <b>White</b> | <b>P-Value</b> |
|---------------------------------|--------------|--------------|----------------|
| <b>PRIMARY OUTCOMES</b>         |              |              |                |
| <b>1 Year Mortality</b>         |              |              |                |
| <b>All</b>                      | 0.071        | 0.059        | 0.001          |
| <b>ACS</b>                      | 0.083        | 0.075        | 0.126          |
| <b>Non-ACS</b>                  | 0.053        | 0.041        | 0.007          |
| <b>SECONDARY OUTCOMES</b>       |              |              |                |
| <b>30 Day Readmission</b>       |              |              |                |
| <b>All</b>                      | 0.136        | 0.129        | 0.138          |
| <b>ACS</b>                      | 0.163        | 0.152        | 0.138          |
| <b>Non-ACS</b>                  | 0.099        | 0.104        | 0.485          |
| <b>1 Year Rehos for MI</b>      |              |              |                |
| <b>All</b>                      | 0.033        | 0.027        | 0.015          |
| <b>ACS</b>                      | 0.041        | 0.036        | 0.238          |
| <b>Non-ACS</b>                  | 0.022        | 0.017        | 0.109          |
| <b>30 Day Blood Transfusion</b> |              |              |                |
| <b>All</b>                      | 0.034        | 0.027        | 0.005          |
| <b>ACS</b>                      | 0.046        | 0.038        | 0.028          |
| <b>Non-ACS</b>                  | 0.016        | 0.015        | 0.783          |
| <b>30 Day AKI</b>               |              |              |                |
| <b>All</b>                      | 0.208        | 0.138        | < 0.001        |
| <b>ACS</b>                      | 0.236        | 0.17         | < 0.001        |
| <b>Non-ACS</b>                  | 0.163        | 0.1          | < 0.001        |
| <b>PROCEDURAL CARE</b>          |              |              |                |
| <b>FFR/IVUS/OCT</b>             |              |              |                |
| <b>All</b>                      | 0.2          | 0.222        | < 0.001        |
| <b>ACS</b>                      | 0.172        | 0.189        | 0.019          |
| <b>Non-ACS</b>                  | 0.241        | 0.258        | 0.087          |
| <b>BMS Stent</b>                |              |              |                |
| <b>All</b>                      | 0.219        | 0.187        | < 0.001        |
| <b>ACS</b>                      | 0.243        | 0.212        | < 0.001        |

**eTable 1. Unadjusted Outcomes Stratified by Presence or Absence of ACS**

|                                   | <b>Black</b> | <b>White</b> | <b>P-Value</b> |
|-----------------------------------|--------------|--------------|----------------|
| <b>Non-ACS</b>                    | 0.184        | 0.158        | 0.002          |
| <b>Radial Access</b>              |              |              |                |
| <b>All</b>                        | 0.169        | 0.118        | < 0.001        |
| <b>ACS</b>                        | 0.172        | 0.118        | < 0.001        |
| <b>Non-ACS</b>                    | 0.166        | 0.118        | < 0.001        |
| <b>Incomplete Revasc</b>          |              |              |                |
| <b>All</b>                        | 0.484        | 0.504        | 0.004          |
| <b>ACS</b>                        | 0.496        | 0.522        | 0.004          |
| <b>Non-ACS</b>                    | 0.467        | 0.484        | 0.124          |
| <b>Post ACEI/ARB</b>              |              |              |                |
| <b>All</b>                        | 0.63         | 0.588        | < 0.001        |
| <b>ACS</b>                        | 0.664        | 0.63         | < 0.001        |
| <b>Non-ACS</b>                    | 0.58         | 0.541        | 0.001          |
| <b>Post Beta-blocker</b>          |              |              |                |
| <b>All</b>                        | 0.734        | 0.728        | 0.384          |
| <b>ACS</b>                        | 0.781        | 0.789        | 0.332          |
| <b>Non-ACS</b>                    | 0.665        | 0.661        | 0.706          |
| <b>Post High Intensity Statin</b> |              |              |                |
| <b>All</b>                        | 0.339        | 0.306        | < 0.001        |
| <b>ACS</b>                        | 0.383        | 0.349        | < 0.001        |
| <b>Non-ACS</b>                    | 0.276        | 0.259        | 0.075          |
| <b>Post Clop/Tic/Pras</b>         |              |              |                |
| <b>All</b>                        | 0.905        | 0.911        | 0.133          |
| <b>ACS</b>                        | 0.91         | 0.917        | 0.227          |
| <b>Non-ACS</b>                    | 0.897        | 0.905        | 0.246          |

Unadjusted proportions for black vs white patients for the outcome listed further stratified by ACS status. P-values from the corresponding Chi-square test are provided.

**eTable 2.** Adjusted Analysis of Bare-Metal Stent Use and  $\beta$ -Blocker Prescription Stratified by Presence or Absence of ACS

|                          | Odds Ratio | 95% CI       | P-Value |
|--------------------------|------------|--------------|---------|
| <b>BMS Stent</b>         |            |              |         |
| Full Model               | 1.26       | (1.16, 1.37) | < 0.001 |
| Non-ACS                  | 1.21       | (1.06, 1.38) | 0.006   |
| ACS                      | 1.3        | (1.17, 1.45) | < 0.001 |
| <b>Post Beta-blocker</b> |            |              |         |
| Full Model               | 0.88       | (0.82, 0.95) | 0.001   |
| Non-ACS                  | 0.92       | (0.83, 1.02) | 0.128   |
| ACS                      | 0.85       | (0.76, 0.94) | 0.002   |

Stratified analysis of bare metal stent use (BMS) and beta-blocker prescription by presence or absence of acute coronary syndrome (ACS). Values greater than 1 indicate higher odds for black patients.
